# Supplementary material
Source: PubMed Central journal article supplement (PMC9807029)
Supplement: NIHMS1857735-supplement-supplement.pdf [file NIHMS1857735-supplement-supplement.pdf]

**Figures****eFigure 1. Distribution of number of external beam radiation fractions.**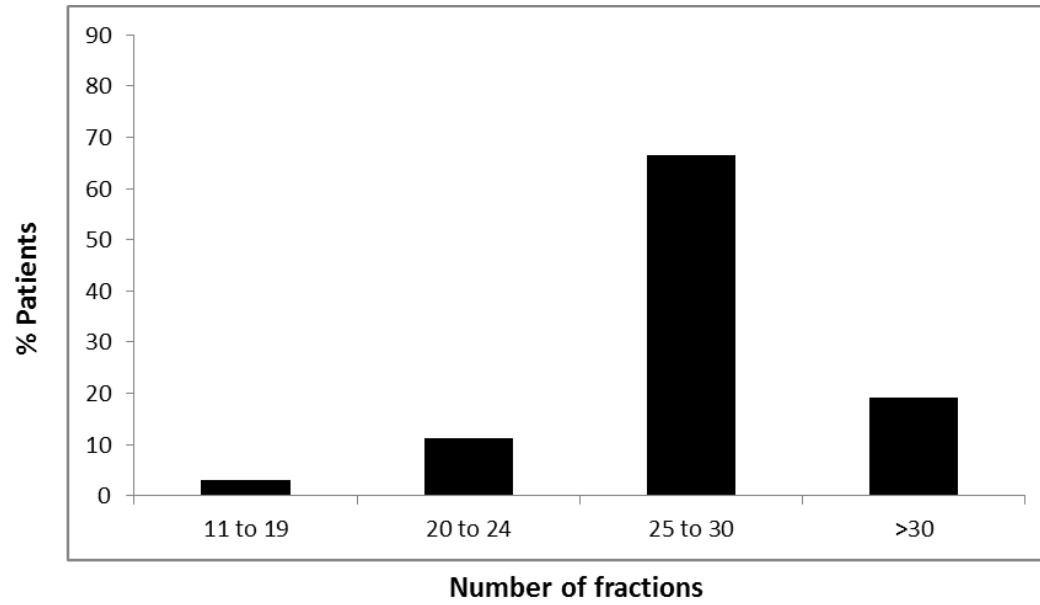

eTable 1. Predictors of receipt of brachytherapy, HDR brachytherapy, IMRT, and chemotherapy

| Variable                       | Received Brachytherapy Boost<br>Hosmer-Lemeshow P=0.96 |             |  |        | Received HDR Brachytherapy<br>Hosmer-Lemeshow P=0.99 |              |  |        |
|--------------------------------|--------------------------------------------------------|-------------|--|--------|------------------------------------------------------|--------------|--|--------|
|                                | Adjusted OR                                            | 95% CI      |  | P      | Adjusted OR                                          | 95% CI       |  | P      |
| <i>Patient attributes</i>      |                                                        |             |  |        |                                                      |              |  |        |
| Age                            | 0.96                                                   | 0.95 - 0.98 |  | <0.001 | 1.01                                                 | 1.00 - 1.03  |  | 0.04   |
| Pelvic/paraortic node involved | 0.54                                                   | 0.36 - 0.80 |  | 0.002  | 1.01                                                 | 0.71 - 1.46  |  | 0.94   |
| Hydronephrosis                 | 0.45                                                   | 0.31 - 0.65 |  | <0.001 | 0.64                                                 | 0.44 - 0.93  |  | 0.02   |
| <i>Treatment attributes</i>    |                                                        |             |  |        |                                                      |              |  |        |
| Year of treatment              |                                                        |             |  | 0.75   |                                                      |              |  | <0.001 |
| 1999                           | 0.54                                                   | 0.08 - 3.63 |  | 0.53   | 0.126                                                | 0.013 - 1.27 |  | 0.08   |
| 2000                           | 1.04                                                   | 0.26 - 4.15 |  | 0.96   | 0.11                                                 | 0.03 - 0.41  |  | 0.001  |
| 2001                           | 0.86                                                   | 0.28 - 2.60 |  | 0.78   | 0.17                                                 | 0.07 - 0.44  |  | 0.002  |
| 2002                           | 1.20                                                   | 0.47 - 3.03 |  | 0.71   | 0.22                                                 | 0.11 - 0.46  |  | <0.001 |
| 2003                           | 0.85                                                   | 0.40 - 1.83 |  | 0.68   | 0.20                                                 | 0.11 - 0.38  |  | <0.001 |
| 2004                           | 1.09                                                   | 0.51 - 2.32 |  | 0.82   | 0.29                                                 | 0.16 - 0.53  |  | <0.001 |

|                                           |      |      |      |                  |      |      |   |      |                  |
|-------------------------------------------|------|------|------|------------------|------|------|---|------|------------------|
| 2005                                      | 0.76 | 0.39 | 1.48 | 0.41             | 0.39 | 0.22 | - | 0.67 | <b>&lt;0.001</b> |
| 2006                                      | 2.31 | 0.91 | 5.86 | 0.08             | 0.56 | 0.32 | - | 0.98 | <b>0.04</b>      |
| 2007                                      | 0.92 | 0.46 | 1.83 | 0.81             | 0.70 | 0.41 | - | 1.20 | 0.19             |
| 2008                                      | 1.21 | 0.62 | 2.35 | 0.58             | 0.88 | 0.53 | - | 1.46 | 0.63             |
| 2009                                      | 1.17 | 0.60 | 2.29 | 0.65             | 0.88 | 0.53 | - | 1.45 | 0.62             |
| 2010                                      | 0.94 | 0.51 | 1.76 | 0.85             | 1.44 | 0.87 | - | 2.39 | 0.16             |
| 2011 (referent)                           | -    |      |      |                  | -    |      |   |      |                  |
| <b>Received concurrent chemotherapy</b>   | 1.60 | 1.11 | 2.30 | <b>0.01</b>      | 1.26 | 0.92 |   | 1.72 | 0.16             |
| <b>Received IMRT</b>                      | 2.84 | 1.62 | 5.01 | <b>&lt;0.001</b> | 1.18 | 0.82 |   | 1.68 | 0.37             |
| <b>Received HDR brachytherapy</b>         | -    |      |      |                  | -    |      |   |      |                  |
| <b><i>Sociodemographic attributes</i></b> |      |      |      |                  |      |      |   |      |                  |
| <b>HMO vs other insurance</b>             | 0.92 | 0.57 | 1.49 | 0.74             | 1.16 | 0.80 |   | 1.67 | 0.44             |
| <b>Employee vs other</b>                  | 0.79 | 0.58 | 1.10 | 0.16             | 1.16 | 0.89 |   | 1.51 | 0.29             |
| <b>Geographic region</b>                  |      |      |      | 0.56             |      |      |   |      | <b>0.04</b>      |
| Northeast                                 | 0.70 | 0.41 | 1.20 | 0.19             | 1.21 | 0.81 |   | 1.81 | 0.35             |

|                                                                       |      |      |      |      |      |      |      |              |
|-----------------------------------------------------------------------|------|------|------|------|------|------|------|--------------|
| Midwest                                                               | -    |      |      |      | 1.32 | 0.98 | 1.80 | 0.07         |
| South (referent)                                                      | 0.79 | 0.53 | 1.18 | 0.25 | -    |      |      |              |
| West                                                                  | 0.79 | 0.46 | 1.37 | 0.40 | 1.80 | 1.16 | 2.80 | <b>0.009</b> |
| <b>Population, persons per county<br/>&gt;1,000,000 vs ≤1,000,000</b> | 0.87 | 0.47 | 1.61 | 0.66 | 0.77 | 0.55 | 1.07 | 0.11         |
| <b>No. of radiation oncologists per HSA<br/>≤10 vs &gt;10</b>         | 1.21 | 0.63 | 2.33 | 0.56 | 1.24 | 0.94 | 1.65 | 0.13         |

*Abbreviations: HDR, high-dose rate; HMO, health maintenance organization; HSA, health services area; IMRT, intensity-modulated radiation therapy; OR, odds ratio.*

eTable 1, continued

| Variable                         | Received IMRT<br>Hosmer-Lemeshow P=0.43 |        |      |                  | Received Chemotherapy<br>Hosmer-Lemeshow P=0.94 |        |      |                  |  |
|----------------------------------|-----------------------------------------|--------|------|------------------|-------------------------------------------------|--------|------|------------------|--|
|                                  | Adjusted OR                             | 95% CI |      | P                | Adjusted OR                                     | 95% CI |      | P                |  |
| <i>Patient attributes</i>        |                                         |        |      |                  |                                                 |        |      |                  |  |
| Age                              | 1.01                                    | 0.99   | 1.03 | 0.10             | 0.97                                            | 0.96   | 0.99 | <b>&lt;0.001</b> |  |
| Pelvic/ paraaortic node involved | 1.64                                    | 1.12   | 2.39 | <b>0.01</b>      | 1.36                                            | 0.92   | 2.01 | 0.12             |  |
| Hydronephrosis                   | 0.89                                    | 0.58   | 1.37 | 0.59             | 1.13                                            | 0.78   | 1.64 | 0.53             |  |
| <i>Treatment attributes</i>      |                                         |        |      |                  |                                                 |        |      |                  |  |
| Year of treatment                |                                         |        |      | <b>&lt;0.001</b> |                                                 |        |      | 0.15             |  |
| 1999                             | -                                       |        |      |                  | 0.15                                            | 0.02   | 0.88 | <b>0.04</b>      |  |
| 2000                             | -                                       |        |      |                  | 0.83                                            | 0.24   | 2.82 | 0.76             |  |
| 2001                             | -                                       |        |      |                  | 0.47                                            | 0.19   | 1.14 | 0.10             |  |
| 2002                             | -                                       |        |      |                  | 0.63                                            | 0.30   | 1.35 | 0.24             |  |
| 2003                             | 0.02                                    | 0.003  | 0.18 | <b>&lt;0.001</b> | 0.55                                            | 0.29   | 1.05 | <b>0.07</b>      |  |
| 2004                             | 0.04                                    | 0.008  | 0.15 | <b>&lt;0.001</b> | 0.58                                            | 0.31   | 1.09 | <b>0.09</b>      |  |

|                                           |      |      |      |                  |      |      |      |                  |
|-------------------------------------------|------|------|------|------------------|------|------|------|------------------|
| 2005                                      | 0.12 | 0.05 | 0.27 | <b>&lt;0.001</b> | 0.44 | 0.25 | 0.79 | <b>0.01</b>      |
| 2006                                      | 0.29 | 0.15 | 0.56 | <b>&lt;0.001</b> | 0.87 | 0.45 | 1.67 | 0.68             |
| 2007                                      | 0.27 | 0.15 | 0.50 | <b>&lt;0.001</b> | 0.94 | 0.51 | 1.74 | 0.84             |
| 2008                                      | 0.40 | 0.24 | 0.66 | <b>&lt;0.001</b> | 1.10 | 0.61 | 1.99 | 0.74             |
| 2009                                      | 0.64 | 0.40 | 1.03 | 0.06             | 0.95 | 0.53 | 1.70 | 0.86             |
| 2010                                      | 0.97 | 0.63 | 1.49 | 0.88             | 0.88 | 0.51 | 1.53 | 0.66             |
| 2011 (referent)                           | -    |      |      |                  | -    |      |      |                  |
| <b>Received concurrent chemotherapy</b>   | 2.62 | 1.58 | 4.33 | <b>&lt;0.001</b> | -    |      |      |                  |
| <b>Received IMRT</b>                      | -    |      |      |                  | 2.31 | 1.51 | 3.54 | <b>&lt;0.001</b> |
| <b>Received HDR</b>                       | 1.01 | 0.75 | 1.36 | 0.94             |      | 1.33 | 2.62 | <b>&lt;0.001</b> |
| <b><i>Sociodemographic attributes</i></b> |      |      |      |                  |      |      |      |                  |
| <b>HMO vs other insurance</b>             | 1.26 | 0.82 | 1.93 | 0.30             | 1.10 | 0.73 | 1.67 | 0.60             |
| <b>Employee vs other</b>                  | 0.90 | 0.66 | 1.23 | 0.52             | 0.94 | 0.70 | 1.27 | 0.22             |
| <b>Geographic region</b>                  |      |      |      | 0.71             |      |      |      | 0.60             |
| Northeast                                 | 1.11 | 0.72 | 1.70 | 0.64             | 0.68 | 0.44 | 1.04 | 0.30             |

|                                                                       |      |      |      |             |      |      |      |      |
|-----------------------------------------------------------------------|------|------|------|-------------|------|------|------|------|
| Midwest                                                               | 0.86 | 0.60 | 1.24 | 0.42        | 0.73 | 0.52 | 1.02 | 0.11 |
| South (referent)                                                      | -    |      |      |             | -    |      |      |      |
| West                                                                  | 0.89 | 0.56 | 1.41 | 0.62        | 0.98 | 0.60 | 1.59 | 0.70 |
| <b>Population, persons per county<br/>&gt;1,000,000 vs ≤1,000,000</b> | 1.47 | 1.03 | 2.10 | <b>0.04</b> | 0.86 | 0.60 | 1.25 | 0.35 |
| <b>No. of radiation oncologists per HSA<br/>≤10 vs &gt;10</b>         | 1.07 | 0.77 | 1.48 | 0.68        | 0.90 | 0.66 | 1.23 | 0.21 |

eTable 2.

| Variable                             | International Classification of Diseases (ICD) Diagnosis or Procedure Code           | Current Procedural Terminology (CPT) Code                                                                                                                                       |
|--------------------------------------|--------------------------------------------------------------------------------------|---------------------------------------------------------------------------------------------------------------------------------------------------------------------------------|
| Cervical cancer diagnosis            | 180.0, 180.1, 180.8, 180.9                                                           |                                                                                                                                                                                 |
| History of cervical cancer diagnosis | V10.40                                                                               |                                                                                                                                                                                 |
| Metastatic cancer                    | 196, 196.0-3, 196.5-6, 196.8-9                                                       |                                                                                                                                                                                 |
| Cervical surgery                     | 68.4, 68.41, 68.49; 68.5, 68.51, 68.59; 68.6, 68.61, 68.69; 68.7, 68.71, 68.79; 68.9 | 57530-57531, 57540, 57545, 57550, 57555-6, 58150, 58152, 58180, 58200, 58210, 58240, 58260, 58262-3, 58267, 58270, 58275, 58280, 58285, 58290-4, 58548, 58550, 58552-4, 58570-3 |
| Brachytherapy                        |                                                                                      | 76965, 77326-77328, 77761-77799, C1715, C1728, Q3001, 55920, 57155, 57156, 58346                                                                                                |



|                                        |                                                                                                          |                                                                                                                                                                                                                                                                                                    |
|----------------------------------------|----------------------------------------------------------------------------------------------------------|----------------------------------------------------------------------------------------------------------------------------------------------------------------------------------------------------------------------------------------------------------------------------------------------------|
| External beam radiation                | 92.21-92.27                                                                                              | 77401-77416, 77418, 77422, 77423,<br>77522-77525, G0174                                                                                                                                                                                                                                            |
| Chemotherapy                           | 99.25                                                                                                    | J9000-J9999, C9418, C9420, C9421,<br>C9415, C9418, Q2048, Q2049,<br>C9280, C9414, C9425, 96400-96549,<br>Q0083-Q0085, G0359-G0361,<br>G9021-G9032, J8520, J8521, J8530,<br>J8540, J8560, J8597, J8610, J8510,<br>J8700, J8999, J8565, J8600, G0355,<br>G0356, C9240, C9127, C9431, C9292,<br>C9440 |
| Platinum chemotherapy                  |                                                                                                          | J9060, J9045, J9062, C9418                                                                                                                                                                                                                                                                         |
| Procedure indicating<br>hydronephrosis | 55.02, 55.03, 55.04, 58.5,<br>57.94, 57.95, 59.93, 59.94,<br>97.61, 97.62, 97.63, 97.64,<br>97.65, 97.69 | 50040, 50125, 50382, 50382, 50384,<br>50385, 50386, 50387, 50389, 50392,<br>50393, 50395, 50398, 50605, 50947,<br>50948, 51702, 51703, 51705, 51710,<br>52005, 52282, 52332, 52334, 59960,<br>59969                                                                                                |

---
